# Supplementary material
Source: PubMed Central journal article supplement (PMC3183777)
Supplement: SD1.pdf [file SD1.pdf]

SUPPLEMENTAL APPENDIX A

Published studies quantifying soil-transmitted helminth prevalence in the United States (likely endemic)

| Study and year                              | Study location     | Study population description                                                       | No. of patients | Hookworm (%) | <i>Trichuris trichiura</i> (%) | <i>Ascaris lumbricoides</i> (%) | <i>Strongyloides stercoralis</i> (%) |
|---------------------------------------------|--------------------|------------------------------------------------------------------------------------|-----------------|--------------|--------------------------------|---------------------------------|--------------------------------------|
| Headlee and Cable, 1942 <sup>1</sup>        | KY                 | Prospective college-based                                                          | 2,393           | 14.6         | 7.9                            | 5.1                             | 3.8                                  |
| Teague, 1945 <sup>2</sup>                   | KY                 | Laboratory                                                                         | 7,499           | 9.6          | 5.2                            | 14.7                            | —*                                   |
| Young, 1955 <sup>3</sup>                    | TN                 | Prospective school-based                                                           | 3,138           | 19.7         | 1.5                            | 6.1                             | 0.1                                  |
| Kelley, 1955 <sup>4</sup>                   | NE                 | Prospective community-based                                                        | 1,096           | 0.4          | —                              | 0.4                             | —                                    |
| Atchley and others, 1956 <sup>5</sup>       | KY                 | Prospective community-based (January to March)                                     | 843             | 0.0          | 24.2                           | 26.8                            | 1.2                                  |
| Atchley and others, 1956 <sup>5</sup>       | KY                 | Prospective community-based (April to July)                                        | 1,800           | 0.5          | 14.6                           | 21.3                            | 2.6                                  |
| Neuman and others, 1956 <sup>6</sup>        | NY                 | Screening in patients with gastrointestinal complaints at outpatient physician     | 222             | 1.8          | 2.7                            | 0.9                             | 1.4                                  |
| Fournelle and others, 1958 <sup>7</sup>     | AK                 | Prospective community-based convenience sample of Alaska Eskimos                   | 1,680           | 0.1          | 0.1                            | 0.0                             | —                                    |
| Myers and others, 1959 <sup>8</sup>         | PA                 | Prospective community-based sample of Puerto Rican children of varying birthplace. | 170             | 2.4          | 22.4                           | 7.1                             | 0.0                                  |
| Weiner and others, 1959 <sup>9</sup>        | PA                 | School-based, Caucasian children                                                   | 169             | 0.0          | 0.0                            | 0.6                             | 0.0                                  |
| Weiner and others, 1959 <sup>9</sup>        | PA                 | School-based, African-American children                                            | 49              | 0.0          | 2.0                            | 0.0                             | 0.0                                  |
| Ching, 1961 <sup>10</sup>                   | HI                 | Laboratory testing of all stool samples submitted to hospitals and physicians      | 1,380           | 0.6          | 2.0                            | 0.9                             | 1.2                                  |
| Melvin and Brooke, 1962 <sup>11</sup>       | MT, SD, NM, AZ, WI | Community-based convenience sample                                                 | 907             | —            | 0.1                            | 0.0                             | —                                    |
| Jeffrey and others, 1963 <sup>12</sup>      | SC                 | Community-based random sample of African-Americans                                 | 212             | 3.8          | 37.3                           | 63.7                            | —                                    |
| Fulmer and Huemphner, 1965 <sup>13</sup>    | KY                 | Prospective school-based, county 1 of 3                                            | 366             | 3.6          | 55.2                           | 48.6                            | 3.8                                  |
| Fulmer and Huemphner, 1965 <sup>13</sup>    | KY                 | Prospective school-based, county 2 of 3                                            | 120             | 0.0          | 6.7                            | 23.3                            | 0.0                                  |
| Fulmer and Huemphner, 1965 <sup>13</sup>    | KY                 | Prospective school-based, county 3 of 3                                            | 125             | 4.0          | 40.8                           | 38.4                            | 4.0                                  |
| Hiller, 1965 <sup>14</sup>                  | NY                 | Laboratory                                                                         | 2,055           | 3.8          | 12.4                           | 1.2                             | 0.4                                  |
| Fournelle and others, 1966 <sup>15</sup>    | AK                 | Prospective community-based convenience sample of Alaska Native Americans          | 389             | 0.3          | 0.0                            | 0.3                             | —                                    |
| Reiber and McCoy, 1967 <sup>16</sup>        | WV                 | Hospital-based sampling of veterans                                                | 200             | —            | —                              | —                               | 4.5                                  |
| Foltz and Harding, 1968 <sup>17</sup>       | IL                 | Laboratory                                                                         | 25,405          | 0.1          | 0.5                            | 0.2                             | 0.1                                  |
| Healy and others, 1969 <sup>18</sup>        | NC                 | Prospective school-based                                                           | 631             | 3.0          | 38.0                           | 49.4                            | —                                    |
| DiSalvo and Melonas, 1969 <sup>19</sup>     | SC                 | Laboratory                                                                         | 26,489          | 2.5          | 1.9                            | 13.2                            | —                                    |
| Gloor and others, 1970 <sup>20</sup>        | KY                 | Prospective school-based                                                           | 439             | 14.8         | 4.8                            | 7.7                             | —                                    |
| Carter and others, 1970 <sup>21</sup>       | SC                 | Outpatient physician, African-American children                                    | 131             | 0.0          | 51.9                           | 48.1                            | —                                    |
| Carter and others, 1970 <sup>21</sup>       | SC                 | Outpatient physician, Caucasian children                                           | 46              | 0.0          | 2.2                            | 2.2                             | —                                    |
| Jacobs and others, 1972 <sup>22</sup>       | SC                 | Prospective school-based                                                           | 5,103           | 0.2          | 13.9                           | 16.5                            | —                                    |
| Martin, 1972 <sup>23</sup>                  | GA                 | Prospective school-based, Caucasian                                                | 3,729           | 4.6          | 0.5                            | 1.3                             | —                                    |
| Martin, 1972 <sup>23</sup>                  | GA                 | Prospective school-based, African-American                                         | 199             | 8.0          | 0.0                            | 0.0                             | —                                    |
| Martin, 1972 <sup>24</sup>                  | GA                 | Community-based random sample of African-Americans and Caucasians                  | 749             | 13.6         | 0.5                            | 4.3                             | —                                    |
| Morgan and others, 1972 <sup>25</sup>       | LA                 | Community-based random sample of lowest 25% socioeconomic stratum                  | 1,651           | 0.4          | 12.3                           | 5.3                             | 0.3                                  |
| Sargent and others, 1972 <sup>26</sup>      | SC                 | Prospective school-based, 32% African-American                                     | 2,932           | 1.8          | 1.1                            | 21.5                            | —                                    |
| Yoeli and others, 1972 <sup>27</sup>        | NY                 | Facility-based, intellectually challenged adults                                   | 18,709          | 0.0          | 2.8                            | 0.0                             | 8.1                                  |
| Berke and others, 1972 <sup>28</sup>        | NY                 | Hospital-based, veterans                                                           | 215             | 7.0          | 0.9                            | 0.0                             | 0.5                                  |
| Dudley and Lease, 1972 <sup>29</sup>        | SC                 | Facility-based, intellectually challenged children                                 | 2,164           | 0.7          | 1.2                            | 4.9                             | —                                    |
| Dudley and Lease, 1973 <sup>30</sup>        | SC                 | School-based, after anthelmintic treatment                                         | 2,114           | 2.5          | 1.5                            | 29.8                            | —                                    |
| Pierz and others, 1973 <sup>31</sup>        | CT                 | Outpatient physician, children from Puerto Rico or of African-American descent.    | 160             | 5.6          | 41.9                           | 3.8                             | —                                    |
| Hubbard and others, 1974 <sup>32</sup>      | LA                 | Prospective school-based, mostly African-American                                  | 887             | 0.1          | 5.3                            | 2.3                             | —                                    |
| Farhadian and Schneider, 1975 <sup>33</sup> | LA                 | Community referral to health center                                                | 1,078           | 0.1          | 14.5                           | 3.9                             | —                                    |
| Desowitz and Wiebenga, 1975 <sup>34</sup>   | HI                 | Prospective school-based, foreign born                                             | 115             | 4.3          | 24.3                           | 9.6                             | 0.9                                  |
| Desowitz and Wiebenga, 1975 <sup>34</sup>   | HI                 | Prospective school-based, United States born                                       | 275             | 1.1          | 0.4                            | 0.0                             | 0.0                                  |
| Eveland and others, 1975 <sup>35</sup>      | NY                 | Laboratory                                                                         | 1,801           | 2.1          | 10.2                           | 2.2                             | 1.3                                  |

(continued)

SUPPLEMENTAL APPENDIX A

Continued

| Study and year                                                 | Study location | Study population description                                      | No. of patients | Hookworm (%) | <i>Trichuris trichiura</i> (%) | <i>Ascaris lumbricoides</i> (%) | <i>Strongyloides stercoralis</i> (%) |
|----------------------------------------------------------------|----------------|-------------------------------------------------------------------|-----------------|--------------|--------------------------------|---------------------------------|--------------------------------------|
| Andrade and Noda, 1977 <sup>36</sup>                           | HI             | Hospital-based, high percentage of immigrants                     | 200             | 1.5          | 2.0                            | 4.0                             | –                                    |
| Ruebush and others, 1978 <sup>37</sup>                         | All            | Laboratory                                                        | 414,820         | 0.8          | 2.7                            | 2.3                             | 0.2                                  |
| Centers for Disease Control and Prevention, 1978 <sup>38</sup> | All            | Laboratory                                                        | 363,567         | 0.8          | 2.2                            | 1.8                             | 0.2                                  |
| Dowda and Moose, 1978 <sup>39</sup>                            | SC             | Laboratory                                                        | 63,978          | 0.4          | 2.1                            | 5.6                             | 0.1                                  |
| Bruckner and others, 1979 <sup>40</sup>                        | CA             | Hospital-based, facility 1 of 2                                   | 1,350           | –            | 3.1                            | 3.9                             | –                                    |
| Bruckner and others, 1979 <sup>40</sup>                        | CA             | Hospital-based, facility 2 of 2                                   | 493             | –            | 2.6                            | 2.0                             | –                                    |
| Centers for Disease Control and Prevention, 1979 <sup>41</sup> | All            | Laboratory                                                        | 332,312         | 0.6          | 1.6                            | 1.4                             | 0.2                                  |
| Lynch and Harmon, 1979 <sup>42</sup>                           | CA             | Community-based, farm workers                                     | 134             | 0.0          | 0.0                            | 1.5                             | 0.0                                  |
| Walker and others, 1980 <sup>43</sup>                          | WV             | Outpatient physician                                              | 108             | 0.0          | 2.8                            | 15.7                            | 0.0                                  |
| Jones, 1975 <sup>44</sup>                                      | KY             | Outpatient physician, rectal exam based                           | 79              | 2.5          | 1.3                            | 15.2                            | 1.3                                  |
| Elliott and others, 1981 <sup>45</sup>                         | TX             | Hospital-based                                                    | 1,626           | 0.4          | 0.3                            | 0.6                             | 0.6                                  |
| Milder and others, 1981 <sup>46</sup>                          | KY             | Laboratory                                                        | 3,217           | 0.2          | 1.5                            | 1.6                             | 2.5                                  |
| Walzer and others, 1982 <sup>47</sup>                          | KY             | Laboratory                                                        | 11,654          | 0.6          | 4.8                            | 4.4                             | 0.9                                  |
| Walzer and others, 1982 <sup>47</sup>                          | KY             | Prospective school-based                                          | 561             | 0.2          | 12.6                           | 14.4                            | 3.0                                  |
| Flores and others, 1983 <sup>48</sup>                          | TX             | Prospective outpatient physician                                  | 321             | 0.0          | 5.0                            | 5.0                             | –                                    |
| Adams and Perkin, 1985 <sup>49</sup>                           | FL             | Prospective community-based                                       | 65              | 1.5          | 13.8                           | 32.3                            | –                                    |
| Dover and others, 1986 <sup>50</sup>                           | SC             | Hospital-based laboratory                                         | 3,770           | 0.3          | 1.0                            | 1.5                             | 0.2                                  |
| Dove and others, 1986 <sup>50</sup>                            | SC             | Laboratory                                                        | 27,820          | 0.3          | 0.7                            | 1.9                             | 0.1                                  |
| Berk and others, 1987 <sup>51</sup>                            | TN             | Prospective random sample, hospitalize veterans                   | 229             | –            | –                              | –                               | 6.1                                  |
| Berk and others, 1987 <sup>51</sup>                            | TN             | Prospective random sample, outpatient veterans                    | 346             | –            | –                              | –                               | 2.6                                  |
| Kappus and others, 1994 <sup>52</sup>                          | All            | Laboratory                                                        | 216,275         | 1.5          | 1.2                            | 0.8                             | 0.4                                  |
| Schupf and others, 1995 <sup>53</sup>                          | NY             | Facility-based, intellectually challenged                         | 3,383           | < 0.5†       | < 0.5†                         | < 0.5†                          | 1.2                                  |
| Amin, 2002 <sup>54</sup>                                       | 48 states      | Laboratory, patients with gastrointestinal complaint              | 5,792           | 0.0          | 0.0                            | 0.2                             | 0.0                                  |
| Escobedo and others, 2009 <sup>55</sup>                        | TX             | Community-based, high percentage of children from Mexico included | 304             | 0.0          | 0.0                            | 0.0                             | 0.0                                  |
| Cardenas and others, 2010 <sup>56</sup>                        | TX             | Community-based, high percentage from Mexico                      | 388             | 0.3          | 0.0                            | 0.3                             | 0.0                                  |
| Church and others, 2010 <sup>57</sup>                          | CO, UT, NM, MT | Laboratory                                                        | 2,604           | 0.0          | 0.0                            | 0.0                             | 0.0                                  |

\* Denotes that *S. stercoralis* testing was not performed as part of this survey.

† Exact prevalence data was not available.

REFERENCES

- Headlee WH, Cable RM, 1942. Intestinal parasitism among students of Berea College, Kentucky. *Am J Trop Med Hyg* 22: 351–360.
- Teague RE, 1945. The common intestinal parasites in Kentucky. Frankfort, KY: Department of Public Health of Kentucky. *Bulletin of the State Department of Health of Kentucky*, 431–439.
- Young MM, 1955. Report of a survey for intestinal parasites in school children in a rural mountain county in Tennessee. *South Med J* 48: 46–53.
- Kelley GW, 1955. Intestinal parasitism in an irrigated community of western Nebraska. *Am J Trop Med Hyg* 4: 901–907.
- Atchley FO, Hemphill EC, Hunt DW, 1956. Current status of intestinal parasitism of man in eastern Kentucky. *J Parasitol* 42: 505–509.
- Neumann E, Matzner MJ, Windwer C, 1956. Intestinal parasitism in ambulatory gastrointestinal patients in Brooklyn, New York. *Gastroenterology* 31: 239–245.
- Fournelle HJ, Wallace IL, Rader V, 1958. A bacteriological and parasitological survey of enteric infections in an Alaskan Eskimo area. *Am J Pub Health* 48: 1989–1997.
- Myers EN, Negron R, Pearlstein H, 1959. Intestinal parasitoses in Puerto Rican preschool children at Philadelphia, Pennsylvania in 1958. *Am J Med Sci* 237: 59–66.
- Weiner D, Brooke MM, Witkow A, 1959. Investigation of parasitic infections in the central area of Philadelphia. *Am J Trop Med Hyg* 8: 625–629.
- Ching HL, 1961. Internal parasites of man in Hawaii with special reference to heterophyid flukes. *Hawaii Med J* 20: 442–445.
- Melvin DM, Brooke MM, 1962. Parasitologic surveys on Indian reservations in Montana, South Dakota, New Mexico, Arizona and Wisconsin. *Am J Trop Med Hyg* 11: 765–772.
- Jeffery GM, Phifer KO, Gatch DE, Harrison AJ, Skinner JC, 1963. Study of intestinal helminth infections in a coastal South Carolina area. *Public Health Rep* 78: 45–55.
- Fulmer HS, Huemphner HR, 1965. Intestinal helminths in eastern Kentucky: a survey in three rural counties. *Am J Trop Med Hyg* 14: 269–275.
- Hiller JM, 1965. Incidence of parasitic diseases in a New York City hospital population. *N Y State J Med* 65: 1108–1109.
- Fournelle HJ, Rader V, Allen C, 1966. A survey of enteric infections among Alaska Indians. *Public Health Rep* 81: 797–803.
- Reiber CD, McCoy JE, 1967. Incidence of *Strongyloides Stercoralis*: A survey of 200 routine admissions to the veterans administration hospital in Beckley, West Virginia. *W V Med J* 63: 42–45.
- Foltz EE, Harding HB, 1968. A continuing survey of parasitism in a Midwestern college community. *Aerosp Med* 39: 74–81.
- Healy GR, Gleason NN, Bokar R, Pond H, Roper M, 1969. Prevalence of ascariasis and amebiasis in Cherokee Indian school children. *Public Health Rep* 84: 907–914.
- DiSalvo AF, Melonas J, 1970. Intestinal parasites in South Carolina, 1969. *J S C Med Assoc* 66: 355–358.
- Gloor RF, Breyley ER, Martinez IG, 1970. Hookworm infection in a rural Kentucky county. *Am J Trop Med Hyg* 19: 1007–1009.
- Carter JP, Vanderzwaag R, Darby WJ, Lease EL, Lauter FH, Dudley BW, High EG, Wright DJ, Murphree T, 1970. Nutrition and parasitism among rural pre-school children in South Carolina. *J Natl Med Assoc* 62: 181–191.

22. Jacobs CF, Teator DM, Jacobs NE, 1972. A survey of intestinal parasites in Charleston County school children. *J S C Med Assoc* 68: 315–319.
23. Martin LK, 1972. Hookworm in Georgia. I. Survey of intestinal helminth infections and anemia in rural school children. *Am J Trop Med Hyg* 21: 919–929.
24. Martin LK, 1972. Hookworm in Georgia. II. Survey of intestinal helminth infections in members of rural households of south-east Georgia. *Am J Trop Med Hyg* 21: 930–943.
25. Morgan PM, Hubbard DW, Willis RA, Unglaub WG, Langham RA, Hedmeg AW, Muldrey JE, 1972. Intestinal parasitism and nutritional status in Louisiana. *J La State Med Soc* 124: 197–203.
26. Sargent RG, Dudley BW, Fox AS, Lease EJ, 1972. Intestinal helminths in children in coastal South Carolina: a problem in south-eastern United States. *South Med J* 65: 294–298.
27. Yoeli M, Most H, Hammond J, Scheinsson GP, 1972. Parasitic infections in a closed community. Results of a 10-year survey in Willowbrook State School. *Trans R Soc Trop Med Hyg* 66: 764–776.
28. Berke R, Wagshol LE, Sullivan G, 1972. Incidence of intestinal parasites in Vietnam veterans. Eosinophilia a guide to diagnosis. *Am J Gastroenterol* 57: 63–67.
29. Dudley BW, Fisher K, 1972. Intestinal parasites and nutritional status. V. Intestinal parasites at certain state-operated institutions in South Carolina. *J S C Med Assoc* 68: 279–284.
30. Dudley BW, Lease EJ, 1973. Intestinal helminths in children in coastal South Carolina: follow-up report. *South Med J* 66: 1100.
31. Pierz JJ, Lau T, Lepow ML, 1973. Prevalence of parasites in Puerto Rican and black children of Hartford, Connecticut. *Conn Med* 37: 291–294.
32. Hubbard DW, Morgan PM, Yaeger RG, Unglaub WG, Hood MW, Willis RA, 1974. Intestinal parasite survey of kindergarten children in New Orleans. *Pediatr Res* 8: 652–658.
33. Farhadian H, Schneider EA, 1975. Trichuriasis in Calcasieu Parish, southwest Louisiana. *J La State Med Soc* 127: 337–340.
34. Desowitz RS, Wiebenga NH, 1975. A survey for intestinal parasites in Oahu schoolchildren. *Hawaii Med J* 34: 21–23.
35. Eveland LK, Kenney M, Yermakov V, 1975. The value of routine screening for intestinal parasites. *Am J Public Health* 65: 1326–1327.
36. Andrade N, Noda K, 1977. The incidence of intestinal parasites in some Hilo Hospital patients. *Hawaii Med J* 36: 172–173.
37. Reubush TK, Juranek DD, Brodsky RE, 1978. Diagnoses of intestinal parasites by state and territorial public health laboratories, 1976. *J Infect Dis* 138: 114–118.
38. Center for Disease Control, 1978. *Intestinal Parasite Surveillance Annual Summary 1977*. Atlanta, GA: Centers for Disease Control and Prevention.
39. Dowda H, Moose J, 1978. Intestinal parasites in South Carolina—a three year study. *J S C Med Assoc* 74: 133–135.
40. Bruckner DA, Garcia LS, Voge M, 1979. Intestinal parasites in Los Angeles, California. *Am J Med Technol* 45: 1020–1022.
41. Center for Disease Control, 1979. *Intestinal Parasite Surveillance Annual Summary 1978*. Centers for Disease Control and Prevention.
42. Lynch MW, Harmon WM, 1979. Human intestinal parasites in a farm community. *West J Med* 131: 336–338.
43. Walker RB, Hough JC, Brough JW, 1980. A survey of intestinal parasites in rural children. *J Fam Pract* 11: 559–561.
44. Jones JE, 1981. Identification of intestinal nematodes using the digital rectal examination. *J Fam Pract* 12: 563–565.
45. Elliott S, Long EG, Truant AL, Smith JH, 1981. Parasitic infections encountered on the Texas Gulf Coast. *Tex Med* 77: 45–46.
46. Milder JE, Walzer PD, Kilgore G, Rutherford I, Klein M, 1981. Clinical features of *Strongyloides stercoralis* infection in an endemic area of the United States. *Gastroenterology* 80: 1481–1488.
47. Walzer PD, Milder JE, Banwell JG, Kilgore G, Klein M, Parker R, 1982. Epidemiologic features of *Strongyloides stercoralis* infection in an endemic area of the United States. *Am J Trop Med Hyg* 31: 313–319.
48. Flores EC, Plumb SC, McNeese MC, 1983. Intestinal parasitosis in an urban pediatric clinic population. *Am J Dis Child* 137: 754–756.
49. Adams RT, Perkin JE, 1985. The prevalence of intestinal parasites in children living in an unincorporated area in rural northern Florida. *J Sch Health* 55: 76–78.
50. Dover C, Holley HP, Jarecki-Black JC, James ER, 1986. A five-year study of intestinal parasites in Charleston, South Carolina. *J S C Med Assoc* 82: 327–332.
51. Berk SL, Verghese A, Alvarez S, Hall K, Smith B, 1987. Clinical and epidemiologic features of strongyloidiasis. A prospective study in rural Tennessee. *Arch Intern Med* 147: 1257–1261.
52. Kappus KD, Lundgren RG, Juranek DD, Roberts JM, Spencer HC, 1994. Intestinal parasitism in the United States: update on a continuing problem. *Am J Trop Med Hyg* 50: 705–713.
53. Schupf N, Ortiz M, Kapell D, Kiely M, Rudelli RD, 1995. Prevalence of intestinal parasite infections among individuals with mental retardation in New York State. *Ment Retard* 33: 84–89.
54. Amin OM, 2002. Seasonal prevalence of intestinal parasites in the United States during 2000. *Am J Trop Med Hyg* 66: 799–803.
55. Escobedo LG, Homedes N, von Alt K, Escobedo MA, 2004. Intestinal parasites in children from three west Texas border communities. *J Sch Health* 74: 411–413.
56. Cardenas VM, Mena KD, Ortiz M, Karri S, Variyam E, Behraves CB, Snowden KF, Flisser A, Bristol JR, Mayberry LF, Ortega YR, Fukuda Y, Campos A, Graham DY, 2010. Hyperendemic *H. pylori* and tapeworm infections in a U.S.–Mexico border population. *Public Health Rep* 125: 441–447.
57. Church C, Neill A, Schotthoefer AM, 2010. Intestinal infections in humans in the Rocky Mountain region, United States. *J Parasitol* 96: 194–196.

SUPPLEMENTAL APPENDIX B

Published studies quantifying soil-transmitted helminth prevalence in the United States (likely imported or population unknown)

| Study and year                             | Study location | Study population description                                            | No. of patients | Hookworm (%) | <i>Trichuris trichiura</i> (%) | <i>Ascaris lumbricoides</i> (%) | <i>Strongyloides stercoralis</i> (%) |
|--------------------------------------------|----------------|-------------------------------------------------------------------------|-----------------|--------------|--------------------------------|---------------------------------|--------------------------------------|
| Weiner and others, 1959 <sup>1</sup>       | PA             | School-based, recent immigrants from Puerto Rico                        | 167             | 21.0         | 67.7                           | 3.6                             | 0.6                                  |
| Winsberg and others, 1975 <sup>2</sup>     | IL             | Community-based, recent immigrants from Puerto Rico                     | 358             | 6.7          | 14.0                           | 0.0                             | 1.7                                  |
| Hargus and others, 1976 <sup>3</sup>       | CT             | School-based, recent immigrants from Puerto Rico                        | 129             | 5.4          | 34.9                           | 3.9                             | 0.8                                  |
| Goldsmith and others, 1976 <sup>4</sup>    | CA             | Outpatient physician, children adopted from Vietnam                     | 88              | 0.0          | 0.0                            | 8.0                             | 1.1                                  |
| Holtan and others, 1979 <sup>5</sup>       | MN             | Immigration clinic, Laotian immigrants                                  | 195             | 12.3         | 3.6                            | 0.0                             | 0.0                                  |
| Lindes, 1979 <sup>6</sup>                  | OH             | Immigration clinic, Laotian immigrants                                  | 70              | 61.4         | 15.7                           | 11.4                            | 4.3                                  |
| Erickson and Hoang, 1980 <sup>7</sup>      | CT             | Immigration clinic, Southeast Asian immigrants                          | 138             | 23.2         | 11.6                           | 23.9                            | 2.9                                  |
| Jones and others, 1980 <sup>8</sup>        | MN             | Immigration clinic, Southeast Asian immigrants                          | 100             | 16.0         | 30.0                           | 41.0                            | 1.0                                  |
| Ortiz, 1980 <sup>9</sup>                   | MA             | Community-based, Puerto Rican migrant workers                           | 377             | 4.5          | 26.0                           | 2.1                             | 0.5                                  |
| Wiesenthal and others, 1980 <sup>10</sup>  | IL             | Immigration clinic, Laotian immigrants                                  | 165             | 64.2         | 12.1                           | 8.5                             | 1.8                                  |
| Arfaa, 1981 <sup>11</sup>                  | CA             | Immigration clinic, Southeast Asian immigrants                          | 186             | 24.7         | 22.0                           | 19.9                            | 9.1                                  |
| Arfaa, 1981 <sup>11</sup>                  | CA             | Immigration clinic, Mexican immigrants                                  | 90              | 2.0          | 12.0                           | 12.0                            | 1.0                                  |
| Borhardt and others, 1981 <sup>12</sup>    | CA             | Immigration clinic, Southeast Asian immigrants                          | 2,226           | 25.8         | 16.1                           | 30.4                            | 4.5                                  |
| Hoffman and others, 1981 <sup>13</sup>     | CA             | Immigration clinic, Vietnamese immigrants                               | 68              | 8.8          | 19.1                           | 76.5                            | 7.4                                  |
| Hoffman and others, 1981 <sup>13</sup>     | CA             | Immigration clinic, Southeast Asian immigrants                          | 149             | 44.3         | 22.8                           | 16.8                            | 17.4                                 |
| Catanzaro and Moser, 1982 <sup>14</sup>    | CA             | Immigration clinic, Southeast Asian immigrants                          | 618             | 37.5         | 4.2                            | 7.4                             | 6.1                                  |
| Lerman and others, 1982 <sup>15</sup>      | CA             | Immigration clinic, Southeast Asian immigrants                          | 226             | 19.9         | 7.1                            | 21.7                            | 4.9                                  |
| Skeels and others, 1982 <sup>16</sup>      | NM             | Immigration clinic, Southeast Asian immigrants                          | 776             | 19.3         | 22.2                           | 25.4                            | 11.5                                 |
| Tittle and others, 1982 <sup>17</sup>      | CA             | Immigration clinic, Southeast Asian immigrants                          | 98              | 23.5         | 14.3                           | 12.2                            | 11.2                                 |
| Sarfaty and others, 1983 <sup>18</sup>     | CA             | Immigration clinic, children from Mexico/Latin America                  | 96              | 1.0          | 22.9                           | 17.7                            | 1.0                                  |
| Barry and others, 1983 <sup>19</sup>       | CT             | Immigration clinic, Southeast Asian immigrants                          | 142             | 22.5         | 23.9                           | 32.4                            | –                                    |
| DeGirolami and Kimber, 1983 <sup>20</sup>  | MA             | Immigration clinic, Southeast Asian immigrants                          | 1,478           | 41.7         | 13.2                           | 12.2                            | 14.1                                 |
| Sutherland and others, 1983 <sup>21</sup>  | MN             | Immigration clinic, Southeast Asian immigrants                          | 483             | 41.2         | 27.7                           | 25.1                            | 18.0                                 |
| Goldenring and Castle, 1983 <sup>22</sup>  | CA             | School-based, Southeast Asian immigrant teenagers                       | 89              | 5.6          | 6.7                            | 0.0                             | 3.4                                  |
| Moore and Buster, 1984 <sup>23</sup>       | FL             | Immigration clinic, Haitians                                            | 97              | 33.0         | 52.6                           | 25.8                            | 1.0                                  |
| Judson and others, 1984 <sup>24</sup>      | CO             | Immigration clinic, Southeast Asian immigrants                          | 781             | 42.4         | 26.1                           | 18.1                            | 11.5                                 |
| Kramer and others, 1984 <sup>25</sup>      | HI             | Immigration clinic, Laotian immigrants                                  | 447             | 54.8         | 28.2                           | 15.4                            | 4.3                                  |
| Kramer and others, 1984 <sup>25</sup>      | HI             | Immigration clinic, Vietnamese immigrants                               | 105             | 13.3         | 11.4                           | 12.4                            | 4.8                                  |
| McCaw and DeLay, 1985 <sup>26</sup>        | CA             | Immigration clinic, Ethiopian immigrants                                | 89              | 4.5          | 1.1                            | 0.0                             | 4.5                                  |
| McCaw and DeLay, 1985 <sup>26</sup>        | CA             | Immigration clinic, Afghan immigrants                                   | 51              | 0.0          | 2.0                            | 9.8                             | 0.0                                  |
| Parish, 1985 <sup>27</sup>                 | WA             | Immigration clinic, Southeast Asian immigrant children                  | 338             | 20.7         | 8.0                            | 2.1                             | 9.2                                  |
| Roberts and others, 1985 <sup>28</sup>     | PA             | Prenatal care, Southeast Asian immigrant pregnant women                 | 97              | 37.1         | 20.6                           | 10.3                            | 10.3                                 |
| Ungar and others, 1986 <sup>29</sup>       | DE, MD, VA     | Migrant farmworker women and children from Latin/Central America        | 339             | 2.1          | 9.7                            | 0.9                             | 0.6                                  |
| Parenti and others, 1986 <sup>30</sup>     | MA, DC         | Immigration clinic, Ethiopian immigrants                                | 191             | 3.7          | 4.2                            | 1.1                             | 4.2                                  |
| Fitzpatrick and others, 1987 <sup>31</sup> | CA             | Immigration clinic, Cambodian immigrant teenagers                       | 46              | 37.0         | 0.0                            | 8.7                             | 19.6                                 |
| Fitzpatrick and others, 1987 <sup>31</sup> | CA             | Immigration clinic, Vietnamese immigrant teenagers                      | 23              | 0.0          | 17.4                           | 56.5                            | 0.0                                  |
| Molina and others, 1988 <sup>32</sup>      | CA             | Immigration clinic, Cambodian immigrants                                | 2,468           | 14.9         | 2.0                            | 1.1                             | 4.4                                  |
| Molina and others, 1988 <sup>32</sup>      | CA             | Immigration clinic, Hmong immigrant                                     | 52              | 1.9          | 1.9                            | 1.9                             | 1.9                                  |
| Nwyanwu and others, 1989 <sup>33</sup>     | TX             | Immigration clinic, Southeast Asian immigrants                          | 1,271           | 12.4         | 12.7                           | 8.6                             | 7.8                                  |
| Salas and others, 1990 <sup>34</sup>       | CA             | Immigration clinic, Mexican immigrants                                  | 125             | 4.8          | 27.2                           | 16.0                            | –                                    |
| Salas and others, 1990 <sup>34</sup>       | CA             | Immigration clinic, Mexican ancestry born in US                         | 91              | 0.0          | 1.1                            | 1.1                             | –                                    |
| Lurio and others, 1991 <sup>35</sup>       | NY             | Immigration clinic, Cambodian immigrants                                | 271             | 56.1         | 3.7                            | 4.8                             | 28.8                                 |
| Hostetter and others, 1991 <sup>36</sup>   | MN             | International adoptees from Asia and Central/South America              | 279             | 1.4          | 2.2                            | 1.1                             | 0.7                                  |
| Johnson and others, 1992 <sup>37</sup>     | MN, MA         | International adoptees from Romania                                     | 61              | 0.0          | 9.8                            | 24.6                            | 14.8                                 |
| Ciesielski and others, 1992 <sup>38</sup>  | NC             | Migrant farmworkers from the United States, Central America, and Mexico | 265             | 5.7          | 5.7                            | 1.1                             | 0.8                                  |
| Ciesielski and others, 1992 <sup>38</sup>  | NC             | Migrant farmworkers from the United States, Central America, and Mexico | 181             | 8.8          | 7.2                            | 1.1                             | 2.2                                  |
| Buchwald and others, 1995 <sup>39</sup>    | WA             | Immigration clinic, Southeast Asian immigrants                          | 201             | 4.5          | 1.0                            | 0.5                             | 2.5                                  |
| Meropol, 1995 <sup>40</sup>                | NY             | International adoptees from Asia and Africa                             | 87              | 5.7          | 2.3                            | 9.2                             | –                                    |
| Hayes and others, 1998 <sup>41</sup>       | ME             | International adoptees from Asia, Africa, and Central/South America     | 87              | 4.6          | 18.4                           | 5.7                             | –                                    |
| Adair and Nwaneri, 1999 <sup>42</sup>      | MN             | Immigration clinic, African immigrants                                  | 53              | 0.0          | 13.2                           | 1.9                             | 0.0                                  |
| Miller and Hendrie, 2000 <sup>43</sup>     | MA             | International adoptees from China                                       | 169             | 0.0          | 0.0                            | 1.2                             | 0.0                                  |
| Sachs and others, 2000 <sup>44</sup>       | MN             | Immigration clinic, East African immigrants                             | 51              | 0.0          | 5.9                            | 2.0                             | 0.0                                  |
| Saiman and others, 2001 <sup>45</sup>      | NY             | International adoptees from Asia, Africa, and Central/South America     | 504             | 0.0          | 0.0                            | 0.2                             | 0.0                                  |

(continued)

SUPPLEMENTAL APPENDIX B

Continued

| Study and year                                | Study location | Study population description                              | No. of patients | Hookworm (%) | <i>Trichuris trichiura</i> (%) | <i>Ascaris lumbricoides</i> (%) | <i>Strongyloides stercoralis</i> (%) |
|-----------------------------------------------|----------------|-----------------------------------------------------------|-----------------|--------------|--------------------------------|---------------------------------|--------------------------------------|
| Lifson and others 2002 <sup>46</sup>          | MN             | Immigration clinic                                        | 2,129           | 3.0          | 8.4                            | 1.4                             | 0.8                                  |
| Geltman and others, 2003 <sup>47</sup>        | MA             | Immigration clinic, African immigrants                    | 1,254           | 1.3          | 9.1                            | 1.6                             | 0.2                                  |
| Garg and others, 2005 <sup>48</sup>           | CA             | Immigration clinic                                        | 533             | 2.1          | 0.4                            | 1.3                             | 1.3                                  |
| Franco-Paredes and others, 2007 <sup>49</sup> | GA             | Immigration clinic, Sudanese immigrants                   | 40              | 0.0          | 0.0                            | 0.0                             | 25.0                                 |
| Posey and others, 2007 <sup>50</sup>          | US             | Immigration clinic, Sudanese immigrants                   | 462             | –            | –                              | –                               | 46.3                                 |
| Posey and others, 2007 <sup>50</sup>          | US             | Immigration clinic, Somali Bantu                          | 100             | –            | –                              | –                               | 23.0                                 |
| Varkey and others, 2007 <sup>51</sup>         | MN             | Immigration clinic, African                               | 1,547           | 8.9          | 44.8                           | 8.6                             | 1.7                                  |
| Varkey and others, 2007 <sup>51</sup>         | MN             | Immigration clinic, Asian                                 | 214             | 32.2         | 8.4                            | 28.0                            | 7.0                                  |
| Varkey and others, 2007 <sup>51</sup>         | MN             | Immigration clinic, European                              | 207             | 1.0          | 13.5                           | 12.6                            | 2.4                                  |
| Miller and others, 2008 <sup>52</sup>         | MA             | International adoptees from Ethiopia                      | 32              | 3.1          | 18.8                           | 6.3                             | 0.0                                  |
| Russell and others, 2010 <sup>53</sup>        | NC             | Migrant farmworkers from Mexico and Central/South America | 16              | 0.0          | 0.0                            | 0.0                             | 0.0                                  |

REFERENCES

- Weiner D, Brooke MM, Witkow A, 1959. Investigation of parasitic infections in the central area of Philadelphia. *Am J Trop Med Hyg* 8: 625–629.
- Winsberg GR, Sonnenschein E, Dyer AR, Schnadig V, Bonilla E, 1975. Prevalence of intestinal parasites in Latino residents of Chicago. *Am J Epidemiol* 102: 526–532.
- Hargus EP, Lepow M, Lau T, Colon AR, 1976. Intestinal parasitosis in childhood populations of Latin origin. Lessons from a survey of 129 such children in Hartford Connecticut. *Clin Pediatr* 15: 927–929.
- Goldsmith R, Stark F, Smith C, Healy G, Donegan E, Juchau V, Stalcup A, 1976. Orphan airlift. Enteric pathogens isolated from Vietnamese children immigrating to the United States. *JAMA* 235: 2114–2116.
- Holtan NR, Corssley KB, Pries CN, 1979. Prevalence of intestinal parasites in a Laotian immigrant community. *Minn Med* 62: 749–752.
- Lindes C, 1979. Intestinal parasites in Laotian refugees. *J Fam Pract* 9: 819–822.
- Erickson RV, Hoang GN, 1980. Health problems among Indochinese refugees. *Am J Public Health* 70: 1003–1006.
- Jones MJ, Thompson JH, Brewer NS, 1980. Infectious diseases of Indochinese refugees. *Mayo Clin Proc* 55: 482–488.
- Ortiz JS, 1980. The prevalence of intestinal parasites in Puerto Rican farm works in western Massachusetts. *Am J Public Health* 70: 1103–1105.
- Wiesenthal AM, Nickels MK, Hashimoto KG, Endo T, Ehrhard HB, 1980. Intestinal parasites in Southeast-Asian refugees. Prevalence in a community of Laotians. *JAMA* 244: 2543–2544.
- Arfaa F, 1981. Intestinal parasites among Indochinese refugees and Mexican immigrants resettled in Contra Costa County, California. *J Fam Pract* 12: 223–226.
- Borchardt KA, Ortega H, Mahood JD, Newman J, Delay PR, Doss J, Hipkins K, Schechter G, Gelber RH, 1981. Intestinal parasites in Southeast Asian refugees. *West J Med* 135: 93–96.
- Hoffman SL, Barrett-Connor E, Norcross W, Nguyen D, 1981. Intestinal parasites in Indochinese immigrants. *Am J Trop Med Hyg* 30: 340–343.
- Catanzaro A, Moser RJ, 1982. Health status of refugees from Vietnam, Laos, and Cambodia. *JAMA* 247: 1303–1308.
- Lerman D, Barrett-Conner E, Norcross W, 1982. Intestinal parasites in asymptomatic adult Southeast Asian immigrants. *J Fam Pract* 15: 443–446.
- Skeels MR, Nims LJ, Mann JM, 1982. Intestinal parasitosis among Southeast Asian immigrants in New Mexico. *Am J Public Health* 72: 57–59.
- Tittle BS, Harris JA, Chase PA, Morrell RE, Jackson RJ, Espinoza SY, 1982. Health screening of Indochinese refugee children. *Am J Dis Child* 136: 697–700.
- Sarfaty M, Rosenberg Z, Siegel J, Levin RM, 1983. Intestinal parasites in immigrant children from Central America. *West J Med* 139: 329–331.
- Barry M, Craft J, Coleman D, Coulter HO, Horwitz R, 1983. Clinical findings in Southeast Asian refugees. *JAMA* 249: 3200–3203.
- DeGirolami PC, Kimber J, 1983. Intestinal parasites among Southeast Asian refugees in Massachusetts. *Am J Clin Pathol* 79: 502–504.
- Sutherland JE, Avant RF, Franz WB, Monzon CM, Stark NM, 1983. Indochinese refugees health assessment and treatment. *J Fam Pract* 16: 61–66.
- Goldenring JM, Castle GF, 1983. Prevalence of disease in Southeast Asian teenagers. Results of screening medical examination at a residential vocational training facility. *J Adolesc Health Care* 4: 266–269.
- Moore JD, Buster SH, 1984. Intestinal parasites in Haitian entrants. *J Infect Dis* 150: 965.
- Judson FN, Lince DM, Anders BJ, Tapy JM, Le Van D, Cohn DL, Kicera TJ, 1984. Health status of Southeast Asian refugees. *West J Med* 141: 183–188.
- Kramer KJ, Ferguson P, McKinny WR, Siddiqui WA, 1984. Parasitic infestations in Southeast Asian refugees. *Hawaii Med J* 43: 12–16.
- McCaw BR, DeLay P, 1985. Demographics and disease prevalence of two new refugee groups in San Francisco. The Ethiopian and Afghan refugees. *West J Med* 143: 271–275.
- Parish RA, 1985. Intestinal parasites in Southeast Asian refugee children. *West J Med* 143: 47–49.
- Roberts NS, Copel JA, Bhutani V, Otis C, Gluckman S, 1985. Intestinal parasites and other infections during pregnancy in Southeast Asian refugees. *J Reprod Med* 30: 720–725.
- Ungar BL, Iscoe E, Cutler J, Bartlett JG, 1986. Intestinal parasites in a migrant farmworker population. *Arch Intern Med* 146: 513–515.
- Parenti DM, Lucas D, Lee A, Hollenkamp RH, 1987. Health status of Ethiopian refugees in the United States. *Am J Public Health* 77: 1542–1543.
- Fitzpatrick S, Johnson J, Sharaq P, Felice ME, 1987. Health care needs of Indochinese refugee teenagers. *Pediatrics* 79: 118–124.
- Molina CD, Molina MM, Molina JM, 1988. Intestinal parasites in Southeast Asian refugees two years after immigration. *West J Med* 149: 422–425.
- Nwyanwu OC, Moore JS, Adams ED, 1989. Parasitic infections in Asian refugees in Fort Worth. *Tex Med* 85: 42–45.
- Salas SD, Heifetz R, Barrett-Conner E, 1990. Intestinal parasites in Central American immigrants in the United States. *Arch Intern Med* 150: 1514–1516.
- Lurio J, Verson H, Karp S, 1991. Intestinal parasites in Cambodians: comparison of diagnostic methods used in screening refugees with implications for treatment of populations with high rates of infestation. *J Am Board Fam Pract* 4: 71–78.

36. Hostettler MK, Liverson S, Thomas W, McKenzie D, Dole K, Johnson DE, 1991. Medical evaluation of internationally adopted children. *N Engl J Med* 325: 479–485.
37. Johnson DE, Miller LC, Iverson S, Thomas W, Franchino B, Dole K, Kiernan MT, Georgieff MK, Hostetter MK, 1992. The health of children adopted from Romania. *JAMA* 268: 2446–2451.
38. Ciesielski SD, Seed JR, Ortiz JC, Metts J, 1992. Intestinal parasites among North Carolina migrant farmworkers. *Am J Public Health* 82: 1258–1262.
39. Buchwald D, Lam M, Hooton TM, 1995. Prevalence of intestinal parasites and association with symptoms in Southeast Asian refugees. *J Clin Pharm Ther* 20: 271–275.
40. Meropol SB, 1995. Health status of pediatric refugees in Buffalo, NY. *Arch Pediatr Adolesc Med* 149: 887–892.
41. Hayes EB, Talbot SB, Matheson ES, Pressler HM, Hanna AB, McCarthy CA, 1998. Health status of pediatric refugees in Portland, ME. *Arch Pediatr Adolesc Med* 152: 564–568.
42. Adair R, Nwaneri O, 1999. Communicable disease in African immigrants in Minneapolis. *Arch Intern Med* 159: 83–85.
43. Miller LC, Hendrie NW, 2000. Health of children adopted from China. *Pediatrics* 105: E76.
44. Sachs WJ, Adair R, Kirchner V, 2000. Enteric parasites in east African immigrants. Symptoms and duration of U.S. residence are not predictive. *Minn Med* 83: 25–28.
45. Saiman L, Aronson J, Zhou J, Gomez-Duarte C, Gabriel PS, Alonso M, Maloney S, Schulte J, 2001. Prevalence of infectious diseases among internationally adopted children. *Pediatrics* 108: 608–612.
46. Lifson AR, Thai D, O'Fallon A, Mills WA, Hang K, 2002. Prevalence of tuberculosis, hepatitis B virus, and intestinal parasitic infections among refugees to Minnesota. *Public Health Rep* 117: 69–77.
47. Geltman PL, Cochran J, Hedgecock C, 2003. Intestinal parasites among African refugees resettled in Massachusetts and the impact of an overseas pre-departure treatment program. *Am J Trop Med Hyg* 69: 657–662.
48. Garg PK, Perry S, Dorn M, Hardcastle L, Parsonnet J, 2005. Risk of intestinal helminth and protozoan infection in a refugee population. *Am J Trop Med Hyg* 73: 386–391.
49. Franco-Paredes C, Dismukes R, Nicolls D, Hidron A, Workowski K, Rodriguez-Morales A, Wilson M, Jones D, Manyang P, Kozarsky P, 2007. Persistent and untreated tropical infectious diseases among Sudanese refugees in the United States. *Am J Trop Med Hyg* 77: 633–635.
50. Posey DL, Blackburn BG, Weinberg M, Flagg EW, Ortega L, Wilson M, Secor WE, Sanders-Lewis K, Won K, Maguire JH, 2007. High prevalence and presumptive treatment of schistosomiasis and strongyloidiasis among African refugees. *Clin Infect Dis* 45: 1310–1315.
51. Varkey P, Jerath AU, Bagniewski S, Lesnick T, 2007. Intestinal parasitic infections among new refugees to Minnesota, 1996–2001. *Travel Med Infect Dis* 5: 223–229.
52. Miller LC, Tseng B, Tirella LG, Chan W, Feig E, 2008. Health of children adopted from Ethiopia. *Matern Child Health J* 12: 599–605.
53. Russell MD, Correa MT, Stauber CE, Kase JA, 2010. North Carolina Hispanic farmworkers and intestinal parasitism: a pilot study of prevalence and health-related practices, and potential means of foodborne transmission. *J Food Prot* 73: 985–988.
